# Supplementary material for: A critical review on the progress and challenges to a more sustainable, cost competitive synthesis of adipic acid
Source: Royal Society of Chemistry journal article supplement (doi:10.1039/d1gc00638j), 2021-01-01
Supplement: d1gc00638j1.xlsx [file d1gc00638j1.xlsx]

## Sheet: Sheet1
Category	Process	Feedstock 1	Feedstock 2	Feedstock 3	Feedstock 1 ($/kg)	Feedstock 2 ($/kg)	Feedstock3($/kg)	Feedstock 1 MW (g/mole)	Feedstock 2 MW (g/mole)	Feedstock 3 MW (g/mole)	Feedstock 1 ($/mole)	Feedstock 2 ($/mole)	Feedstock 3 ($/mole)	Moles of Feedstock 1	Moles of Feedstock 2	Moles of Feedstock 3	Total Feed Stock Costs (100% conversion)	Yield Low End	Yield High End	Feedstock Fraction Low	Feedstock Fraction High	Operating Costs Low	Operating Costs High
Incumbent	NO	Benzene	Water	--	1.02	0.014	0	78.11	18.01	--	0.0796722	0.00025214	--	1	1	--	0.546903	0.9	0.95	0.7	0.8	0.719609	0.868099
Petrochemical	Butadiene Process	Butadiene	CO	Water	0.79	0.1	0.014	54.0916	28.01	18.01	0.0427324	0.002801	0.00025214	1	2	2	0.334191	0.65	0.7	0.7	0.8	0.596769	0.734485
Biobased-Fermentation	Direct ADP Fermentation	Glucose/CO2	--	--	0.396	--	--	180.156	--	--	0.0713418	--	--	1.083	--	--	0.528693	0.72	0.95	0.4	0.6	0.927531	1.83574
Biobased-Fermentation/Chemical	Succinic acid	Glucose/CO2	H2	CO	0.396	1.25	0.1	180.156	2	28.01	0.0713418	0.0025	0.002801	0.85	4	2	0.521709	0.7	0.95	0.4	0.6	0.915278	1.86325
Biobased-Fermentation/Chemical	cis-cis-muconic acid	Glucose/CO2	H2	O2	0.396	1.25	--	180.156	2	--	0.0713418	0.0025		0.857	2	--	0.452579	0.3	0.95	0.4	0.6	0.793998	3.77149
Biobased-Fermentation/Chemical	cis-cis-muconic acid Lignin ($0.04/kg)	Lignin/CO2	H2	O2	0.04	1.25	--	163.15	2	--	0.006526	0.0025		1	2	--	0.0788696	0.25	0.9	0.4	0.6	0.146055	0.788696
Biobased-Fermentation/Chemical	cis-cis-muconic acid Lignin ($0.15/kg)	Lignin/CO2	H2	O2	0.15	1.25	--	163.15	2	--	0.0244725	0.0025		1	2	--	0.201673	0.25	0.9	0.4	0.6	0.373469	2.01673
Biobased-Fermentation/Chemical	Glucaric Acid Fermentation	Glucose	H2	--	0.396	1.25	--	180.156	2	--	0.0713418	0.0025		1	4	--	0.556602	0.1	0.95	0.4	0.6	0.976494	13.915
Biobased-Chemical	Glucaric Acid Chemical	Glucose	H2	--	0.396	1.25	--	180.156	2	--	0.0713418	0.0025	--	1.23	4	--	0.668882	0.58	0.95	0.7	0.8	0.880108	1.64749
